# Supplementary material for: Cyclodextrin carriers of positively charged porphyrin sensitizers
Source: Royal Society of Chemistry journal article supplement (doi:10.1039/b908772a), 2009-01-01
Supplement: b908772a.pdf [file b908772a.pdf]

## Electronic Supplementary Information

### Cyclodextrin carriers of positively charged porphyrin sensitizers

Jiří Mosinger,<sup>\*a,c</sup> Lenka Slavětínská,<sup>a,b</sup> Kamil Lang,<sup>c</sup> Pavel Coufal<sup>d</sup> and Pavel Kubát<sup>e</sup>

<sup>a</sup> Department of Inorganic Chemistry, Faculty of Science, Charles University in Prague, Hlavova 2030, 128 43 Prague 2, Czech Republic. Fax: +420221951253, e-mail: mosinger@natur.cuni.cz

<sup>b</sup> Institute of Chemical Process Fundamentals, v.v.i., Academy of Sciences of the Czech Republic, Rozvojová 136, 165 02 Prague 6, Czech Republic

<sup>c</sup> Institute of Inorganic Chemistry, v.v.i., Academy of Sciences of the Czech Republic, 250 68 Řež, Czech Republic

<sup>d</sup> Department of Analytical Chemistry, Faculty of Science, Charles University in Prague, Hlavova 2030, 128 43 Prague 2, Czech Republic.

<sup>e</sup> J. Heyrovský Institute of Physical Chemistry, v.v.i., Academy of Sciences of the Czech Republic, Dolejškova 3, 182 23 Prague 8, Czech Republic

### ESI-mass spectra

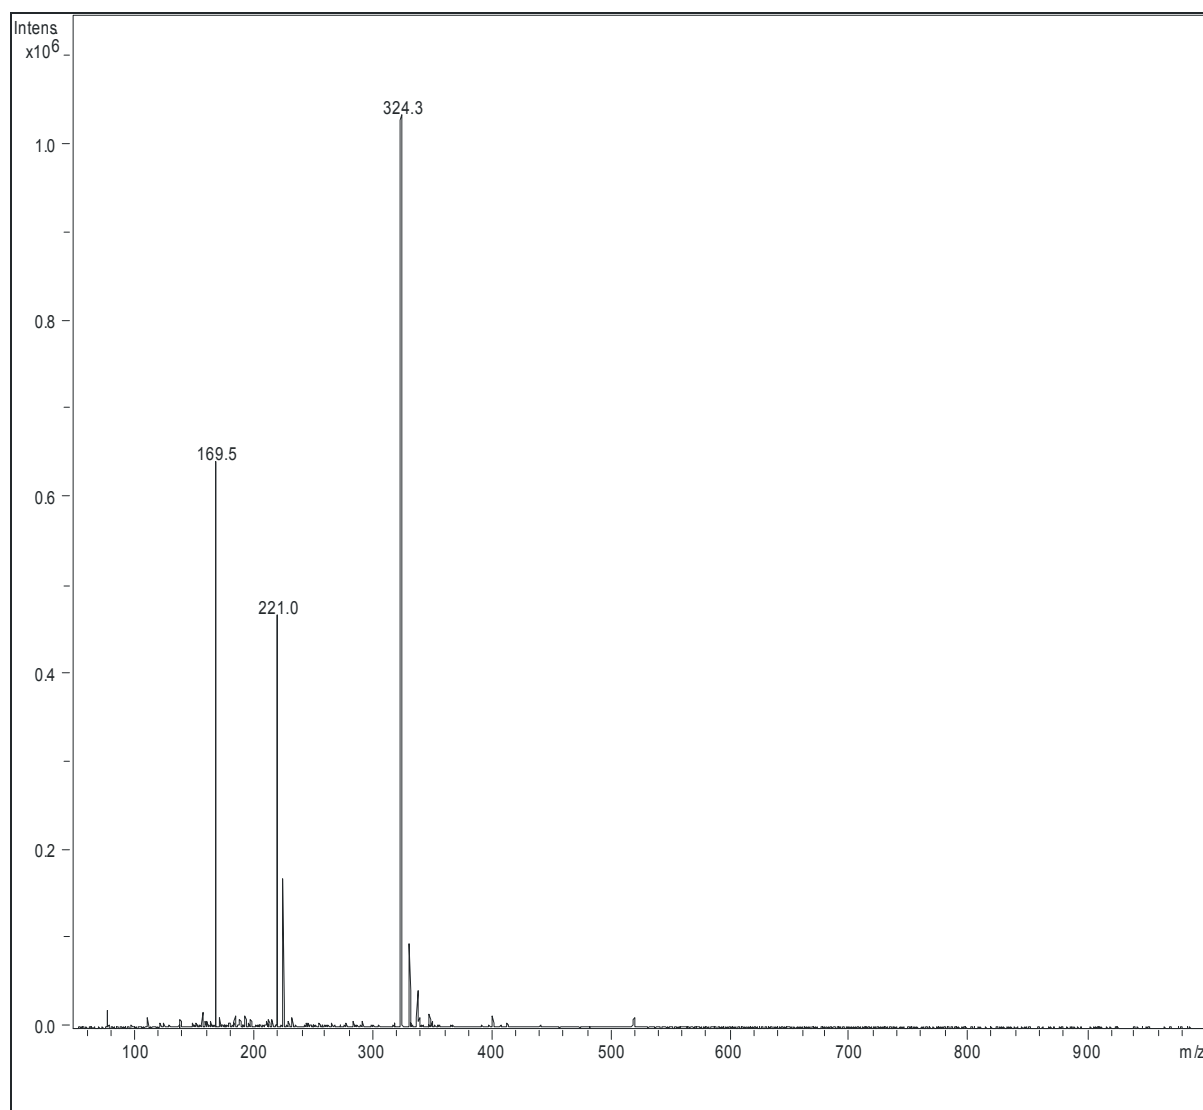

Figure S1.

ESI-MS of TMPyP/Cl shows fragments corresponding to  $M/z = 169.5$  (TMPyP)<sup>4+</sup>,  $221.0$  (TMPyP – CH<sub>3</sub>)<sup>3+</sup>,  $324.3$  (TMPyP – 2CH<sub>3</sub>)<sup>2+</sup>.

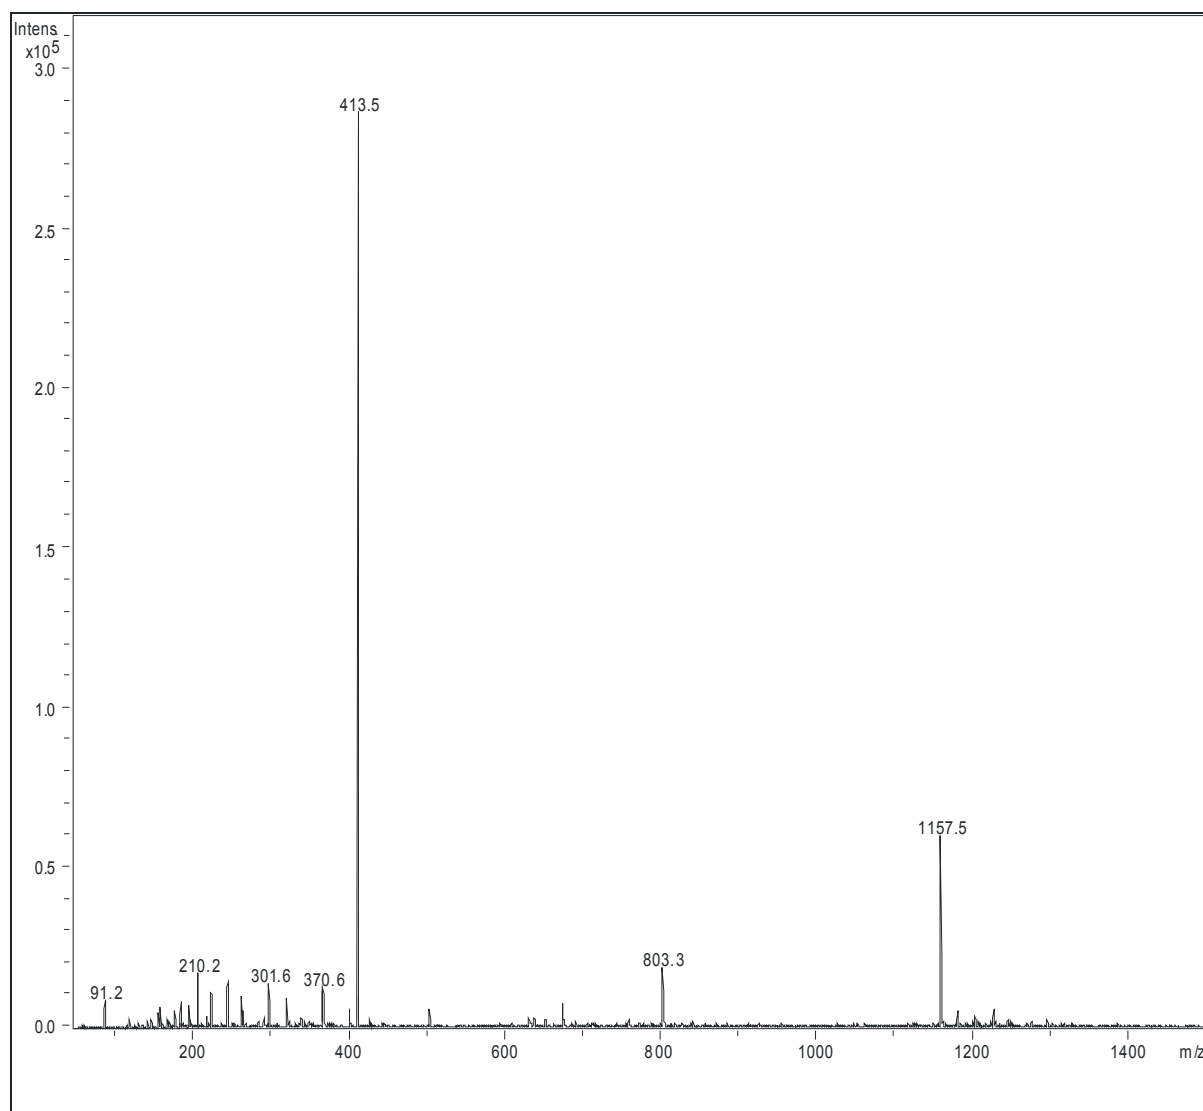

Figure S2.  
ESI-MS of  $\beta$ CD. Fragment  $M/z = 1157.5$  corresponds to  $(\beta\text{CD} + \text{Na})^+$ .

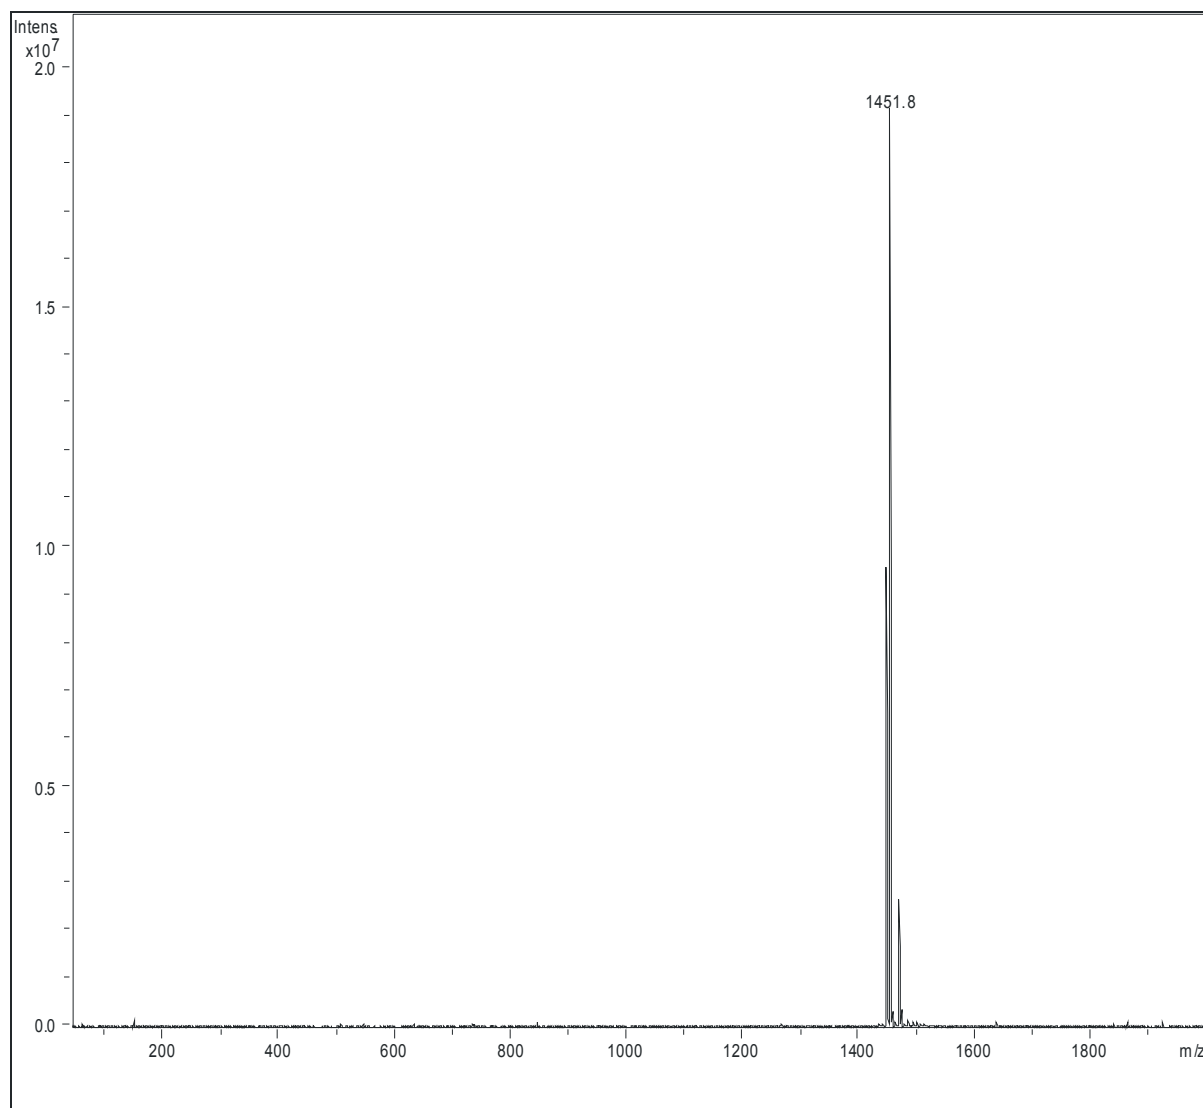

Figure S3.  
ESI-MS of triMe $\beta$ CD. Fragment  $M/z = 1451.8$  corresponds to  $(\text{triMe}\beta\text{CD} + \text{Na})^+$ .

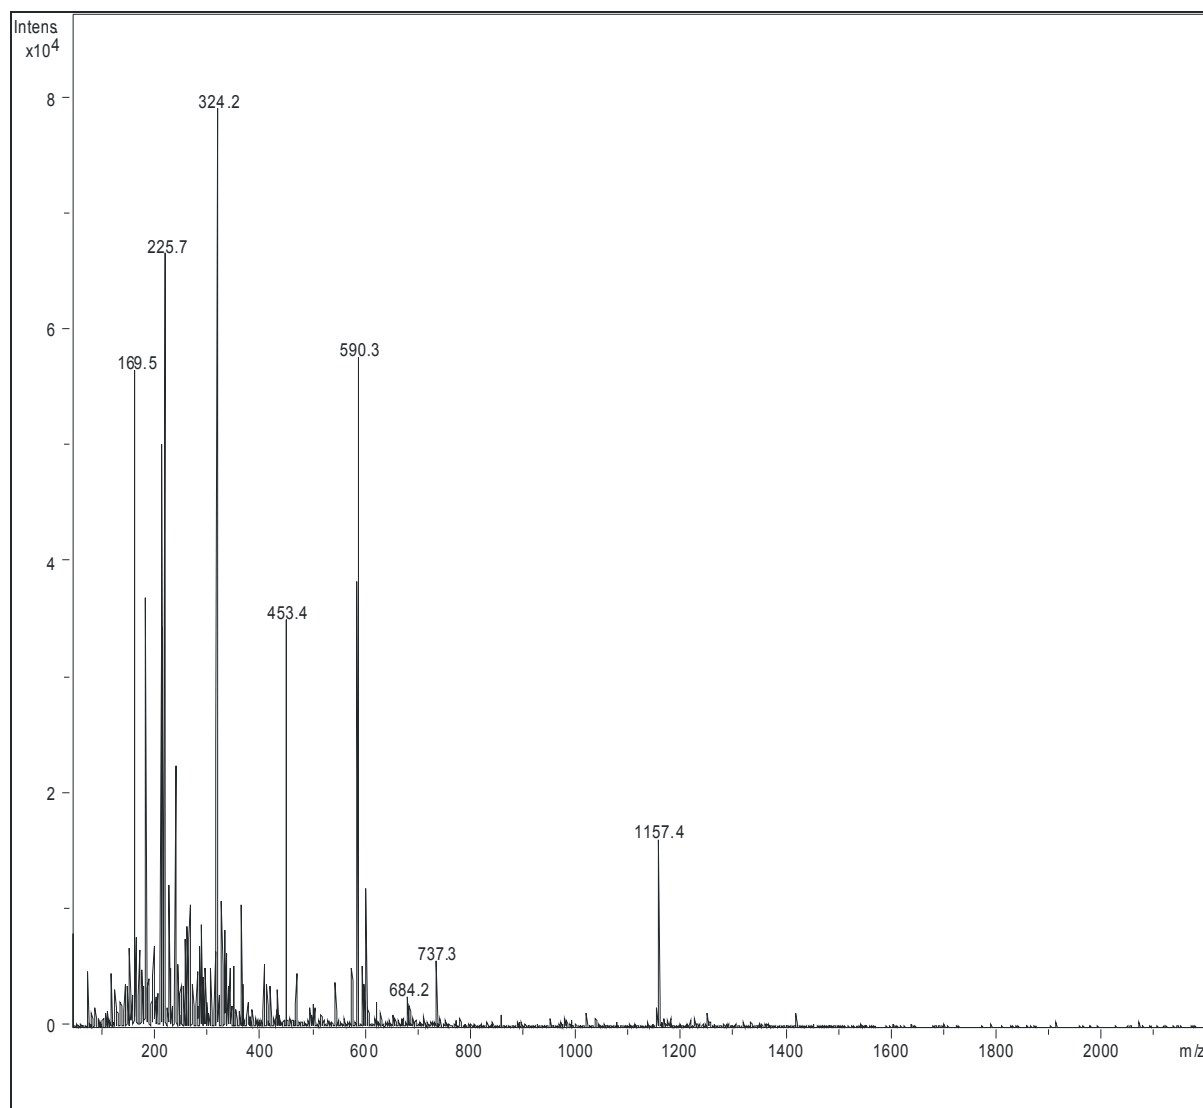

Figure S4.  
ESI-MS of supramolecular complex TMPyP- $\beta$ CD. Fragments correspond to  $M/z = 169.5$  (TMPyP)<sup>4+</sup>,  $324.2$  (TMPyP - 2CH<sub>3</sub>)<sup>2+</sup> and  $453.4$  (TMPyP +  $\beta$ CD)<sup>4+</sup>.

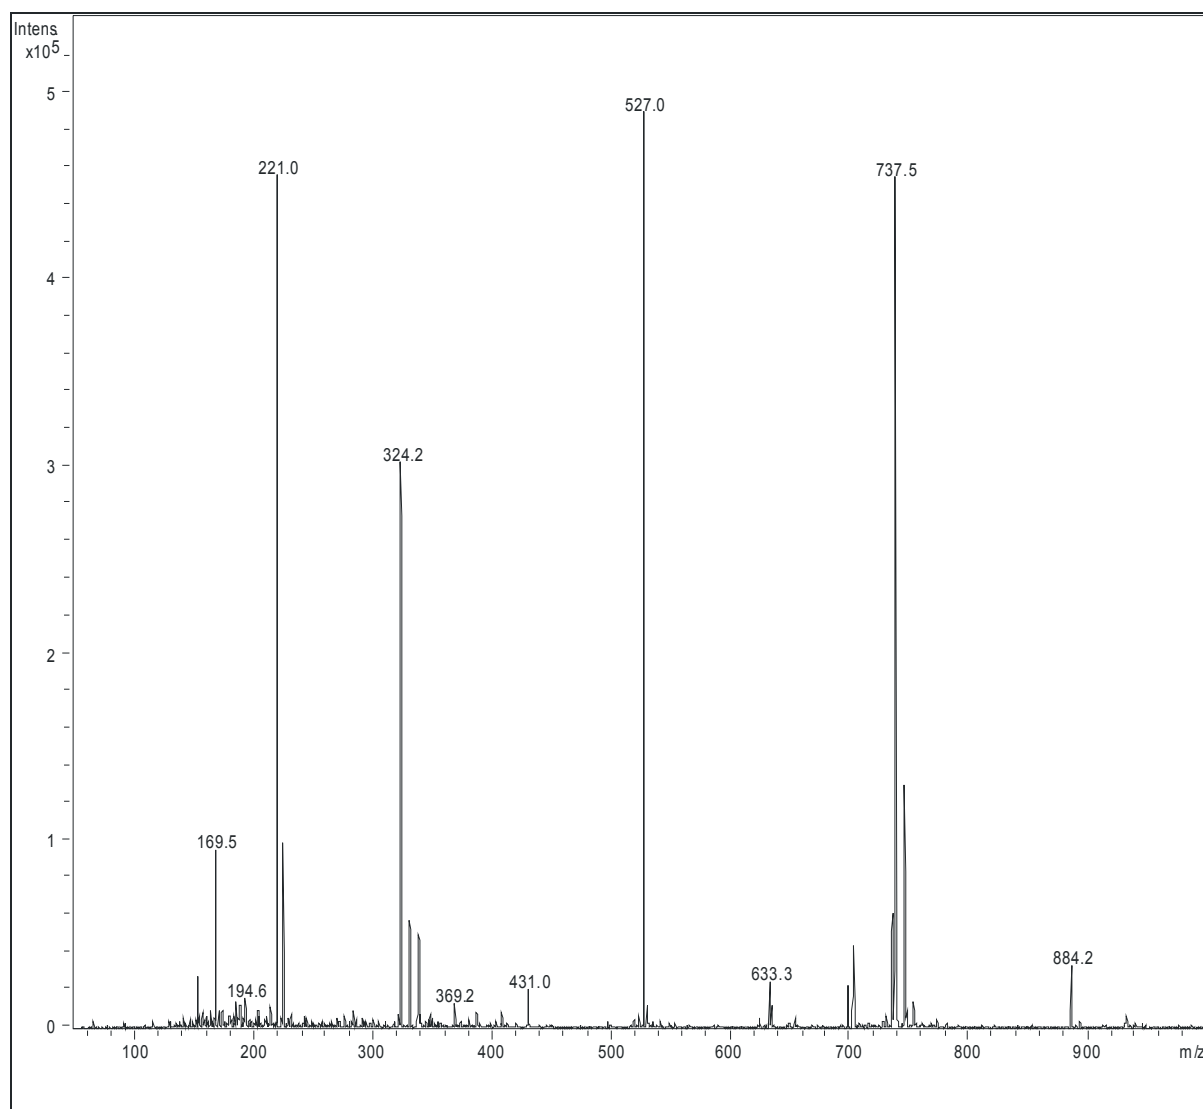

Figure S5.  
ESI-MS of supramolecular complex TMPyP-triMe $\beta$ CD. Fragments correspond to M/z = 169.5 (TMPyP)<sup>4+</sup>, 221.0 (TMPyP – CH<sub>3</sub>)<sup>3+</sup>, 324.2 (TMPyP – 2CH<sub>3</sub>)<sup>2+</sup> and 527.0 (TMPyP + triMe $\beta$ CD)<sup>4+</sup>.

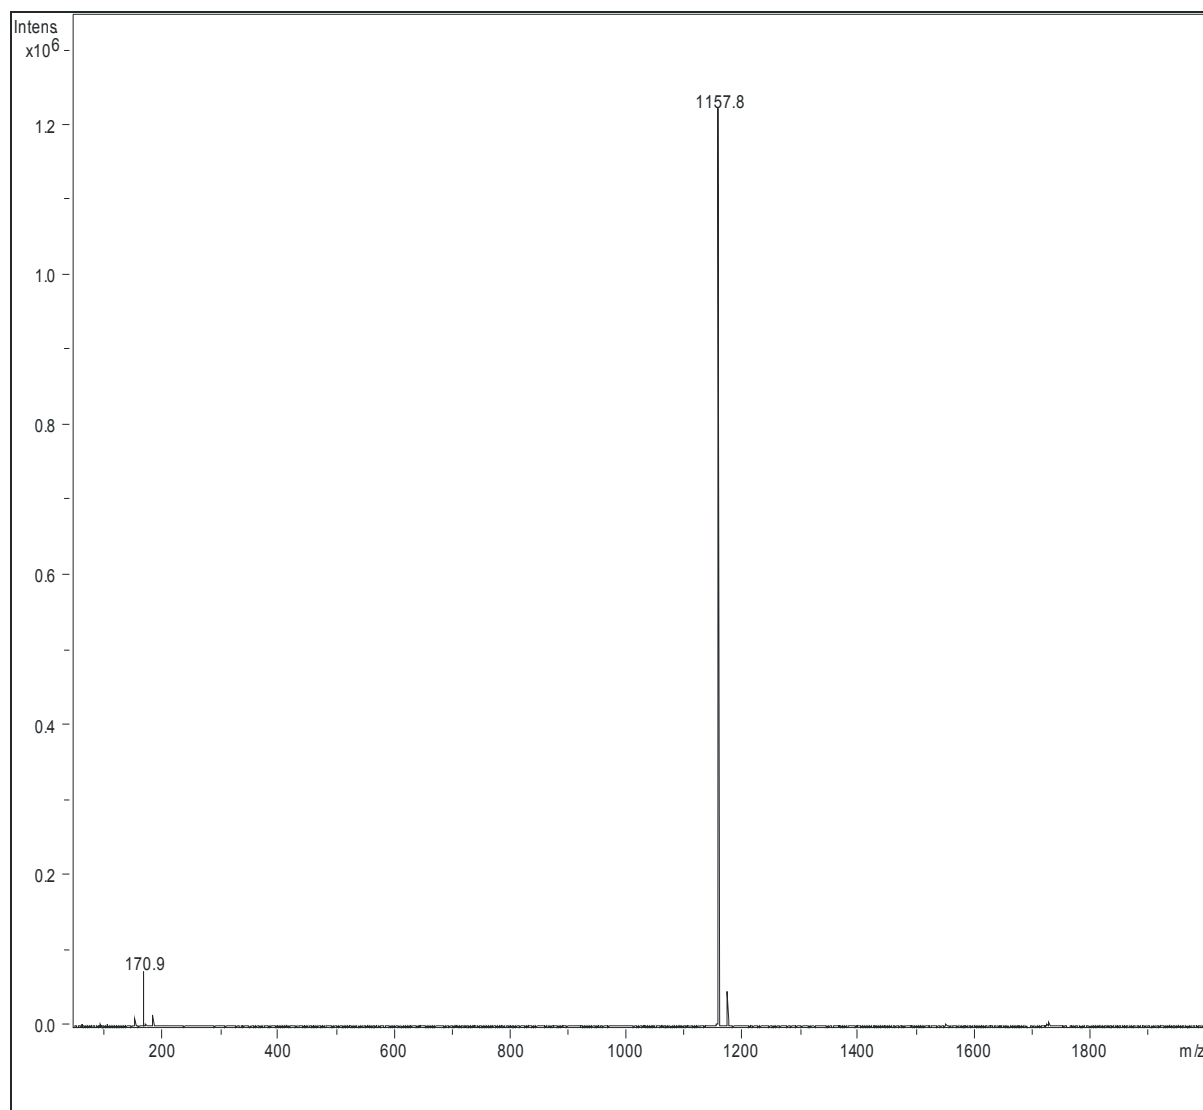

Figure S6.  
ESI-MS of supramolecular complex Tos- $\beta$ CD. Fragments correspond to  $M/z = 170.9$  (Tos),  
 $1157.8$  ( $\beta$ CD + Na)<sup>+</sup>.

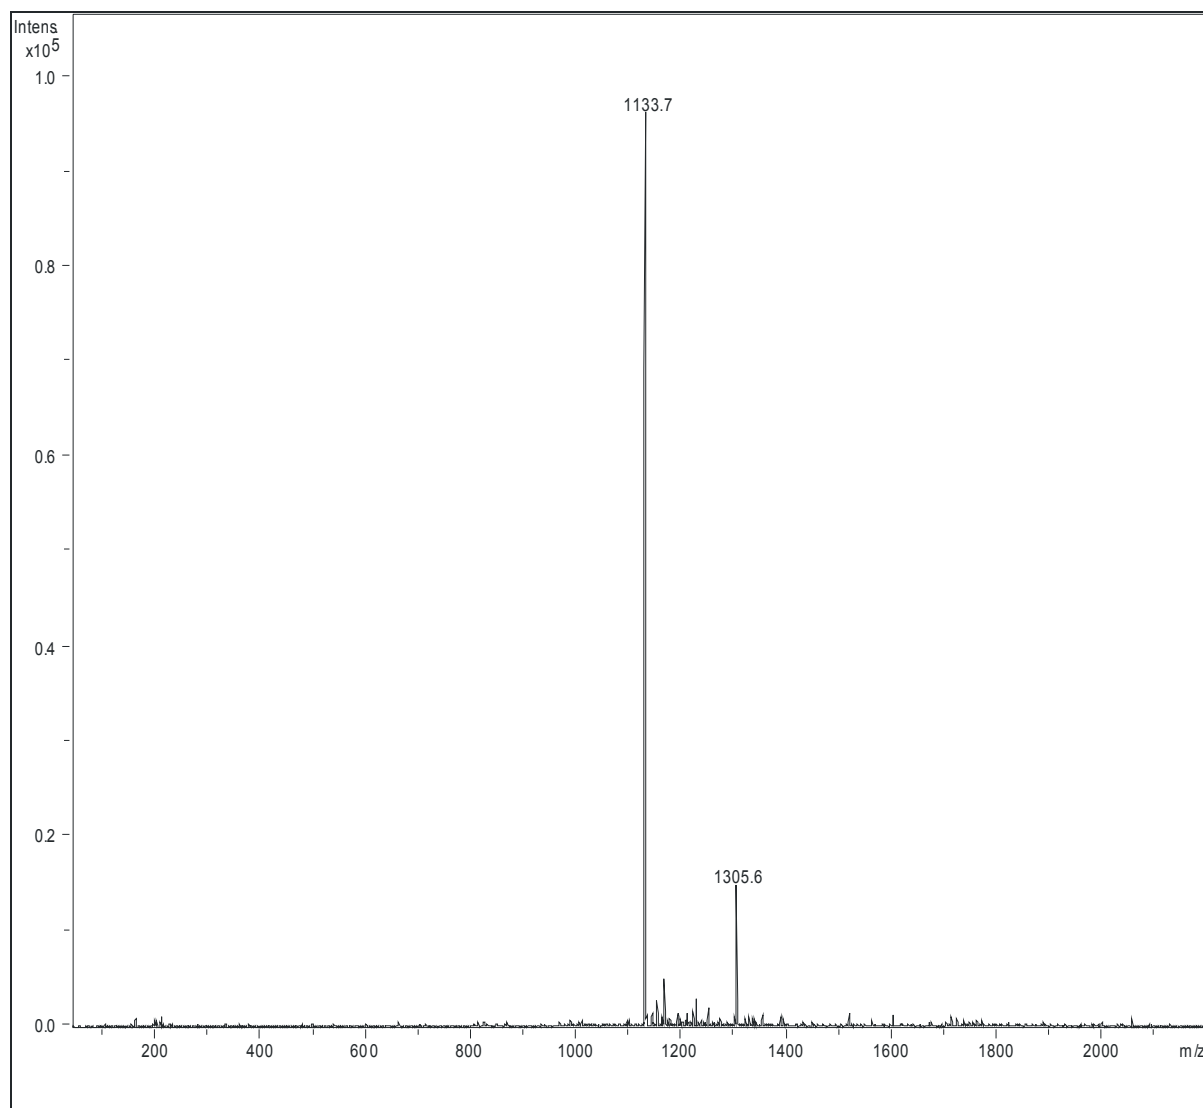

Figure S7.  
ESI-MS of supramolecular complex Tos- $\beta$ CD. Fragment corresponds to  $M/z = 1305.6$  (Tos +  $\beta$ CD)<sup>-</sup>.

## <sup>1</sup>H NMR spectra

Table S1.

<sup>1</sup>H NMR chemical shifts  $\delta_{\text{H}}$  (ppm) of triMe $\beta$ CD, TMPyP/Tos and corresponding supramolecular complex in D<sub>2</sub>O solution.

| H    | triMe $\beta$ CD | TMPyP/Tos |                  |
|------|------------------|-----------|------------------|
|      |                  | -         | triMe $\beta$ CD |
| 1    | 5.28             | -         | 5.22             |
| 2    | 3.35             | -         | 3.29             |
| 3    | 3.68             | -         | 3.62             |
| 4    | 3.74             | -         | 3.68             |
| 5    | 3.86             | -         | 3.81             |
| 6    | 3.85             | -         | 3.79             |
| 6'   | 3.66             | -         | 3.62             |
| Me-2 | 3.52             | -         | 3.48             |
| Me-3 | 3.62             | -         | 3.54             |
| Me-6 | 3.39             | -         | 3.38             |
| H-a  | -                | 9.10      | 9.11             |
| H-b  | -                | 8.92      | 8.94             |
| H-c  | -                | 9.31      | 9.31             |
| H-d  | -                | 4.82      | 4.81             |
| H-e  | -                | 7.19      | 7.23             |
| H-f  | -                | 6.56      | 6.62             |
| H-g  | -                | 1.61      | 1.68             |
